# Supplementary material
Source: publisher figshare collection journal article supplement (https://gsapubs.figshare.com/ndownloader/files/22398381)
Supplement: Supplementary file 1 [file 22398381]

Table A3 Apatite Fission Track Analysis

| Sample # and  rock type | Lat. (°N)  Lon. (°W) | Elev. (m) | n | ρs | Ns | ρi | Ni | P(X2) (%) | ρD | ND | **Age (Ma) ± 2σ** | Mean  lengths (μm) | n | Dpar  (μm) |
| --- | --- | --- | --- | --- | --- | --- | --- | --- | --- | --- | --- | --- | --- | --- |
| **North of Denali Fault** | | | | | | | | | | | | | | |
| 01BAL  Granite | 63.6326  146.8637 | 2499 | 11 | 0.051 | 19 | 1.690 | 631 | 6.7 | 1.262 | 2038 | **6.7 ± 1.6** | 12.4 | 1 | 1.99 |
| 05PH001A  Tonalite | 63.5952  146.9522 | 2003 | 37 | 0.021 | 45 | 1.797 | 2141 | 74.5 | 1.334 | 3334 | **5.1 ± 0.8** | 11.79 ± 0.66 | 7 | 1.52 |
| 05PH002A  Granite | 63.5730  146.9507 | 1607 | 16 | 0.030 | 18 | 2.058 | 1253 | 29.6 | 1.330 | 3325 | **3.5 ± 0.8** | none | -- | 1.83 |
| 05PH005A  Diorite | 63.5291  147.0158 | 1282 | 40 | 0.014 | 28 | 1.245 | 2443 | 75.1 | 1.323 | 3308 | **2.8 ± 0.5** | 13.86 | 1 | -- |
| 05PH005B  Aplite | 63.5291  147.0158 | 1282 | 40 | 0.010 | 28 | 0.795 | 2289 | 98 | 1.320 | 3299 | **2.9 ± 0.6** | 12.5 ± 0.74 | 13 | 1.50 |
| 05PH006A  Granodiorite | 63.5386  147.0736 | 1730 | 40 | 0.046 | 128 | 4.035 | 11217 | 23.1 | 1.294 | 3235 | **2.7 ± 0.2** | none | -- | 1.36 |
| 05NEN  Granodiorite | 63.5098  147.8443 | 1640 | 30 | 0.030 | 20 | 5.680 | 3842 | 24 | 1.315 | 2124 | **1.2 ± 0.3** | 13.9 ± 1.40 | 18 | 2.06 |
| 22DEB  Granitoid | 63.5391  147.3237 | 1341 | 30 | 0.013 | 42 | 3.220 | 3135 | <1 | 1.395 | 2254 | **3.3 ± 0.5** | 12.2 ± 0.70 | 8 | 1.99 |
| **South of Denali Fault** | | | | | | | | | | | | | | |
| 05PH003A  Tonalite | 63.5043  146.8302 | 1358 | 20 | 0.269 | 157 | 4.001 | 2449 | 99.5 | 1.327 | 3316 | **15.5 ± 1.3** | 11.94 ± 0.28 | 24 | 2.02 |

Notes: Track densities (ρ) are x 106 tracks cm-2. s: spontaneous, i: induced, D: dosimeter; n: number of grains counted for age or length determination. All analyses are by the External Detector Method using 0.5 for the geometry correction factor. Apatite ages calculated using dosimeter glass CN5 and zeta = 364.0 ± 6.3 (± 1σ). Apatite ages for three samples (01BAL, 05NEN, and 22DEB) were calculated using a zeta = 349.0 ± 5.1 (± 1σ). Age standards include Fish Canyon Tuff, Durango and Mount Dromedary apatites. P(χ2) is the probability of obtaining χ2 value for v degrees of freedom (where v is the number of crystals -1) [Galbraith, 1981]; pooled ρs/ρi ratio is used to calculate age and uncertainty where P(χ2) >5%; mean ρs/ρi ratio is used for samples where P(χ2) <5% and for which Central ages [Galbraith and Laslett, 1993] are calculated. Apatite grain mounts were etched in 5 M HNO3 for 20 s at 21 deg. C.
